# Supplementary material for: Colloidal synthesis of pure CuInTe2 crystallites based on the HSAB theory
Source: Royal Society of Chemistry journal article supplement (doi:10.1039/c6nj02108e), 2016-01-01
Supplement: c6nj02108e1.pdf [file c6nj02108e1.pdf]

## **Colloidal synthesis of pure CuInTe<sub>2</sub> crystallites based on the HSAB theory**

Nthabiseng Ntholeng<sup>1</sup>, Benny Mojela<sup>1</sup>, Siziwe Gqoba<sup>1</sup>, Mildred Airo<sup>1</sup>, Stefan Govindraj<sup>1,2</sup>,

Makwena J. Moloto<sup>3</sup>, Juanita van Wyk<sup>1</sup>, Nosipho Moloto<sup>1,2\*</sup>

<sup>1</sup>Molecular Sciences Institute, School of Chemistry, University of the Witwatersrand, Private

Bag X3, Johannesburg, South Africa, 2050

<sup>2</sup>Materials for Energy Research Group, University of the Witwatersrand, Private Bag 3, Wits,

2050, Republic of South Africa

<sup>3</sup>Department of Chemistry, Vaal University of Technology, Private Bag X021,

Vanderbijlpark, 1900, Republic of South Africa

\*Corresponding Author: N. Moloto

Email: Nosipho.Moloto@wits.ac.za

Tel: +27117176774

Fax: +27865228349

## Optical measurement calculations

The UV-Vis absorption spectroscopy is frequently used to characterize semiconductors thin films.<sup>1</sup> Due to low scattering in solid films, it is easy to extract the  $E_g$  values from their absorption spectra knowing their thickness.<sup>1</sup> However, it is possible to obtain the powdered samples instead of thin films or colloids and their UV-Vis absorption measurements is frequently carried out by dispersing samples in liquid media.<sup>2</sup> Dispersing the powdered materials in liquid media can result in contamination or consumption of the material which will make the absorption spectrum challenging to interpret.<sup>2</sup> If the absorption peak is not well resolved, it may be difficult to estimate the  $E_g$  thus leading to inaccurate conclusion. On the hand the use of DRS (Diffuse Reflectance Spectroscopy) is more convenient as it takes advantage of the enhanced light scattering in powdered materials.<sup>2</sup> However, it is possible to determine the band gap from diffuse reflectance spectrum using the Tauc plot. The following relational expression proposed by Tauc, Davis, and Mott is used.

$$(h\nu\alpha)^{1/n} = A(h\nu - E_g) \quad (1)$$

Where,  $h$ : Planck's constant,  $\nu$ : frequency of vibration,  $\alpha$ : absorption coefficient,  $E_g$ : band gap,  $A$ : proportional constant. The value of the exponent  $n$  denotes the nature of the sample transition.

For direct allowed transition,  $n = 1/2$

For direct forbidden transition,  $n = 3/2$

For indirect allowed transition,  $n = 2$

For indirect forbidden transition,  $n = 3$

Since the direct allowed sample transition is used in this experiment,  $n = 1/2$  is used for these samples. The acquired diffuse reflectance spectrum is converted to Kubelka-Munk function.

Thus, the vertical axis is converted to quantity  $F(R_\infty)$ , which is proportional to the absorption coefficient. The  $\alpha$  in the Tauc equation is substituted with  $F(R_\infty)$ . Thus, in the actual experiment, the relational expression becomes:

$$(hvF(R_\infty))^2 = A(hv - E_g) \quad (2)$$

Using the Kubelka-Munk function, the  $(hvF(R_\infty))^2$  was plotted against the  $hv$ . The curve that plots the value of  $(hv - (hvF(R_\infty))^2)$  on the horizontal axis  $hv$  and vertical axis  $(hvF(R_\infty))^2$  is drawn. Here, the unit for  $hv$  is eV (electron volts), and its relationship to the wavelength  $\lambda$  (nm) becomes  $hv = 1239.7/\lambda$ . A line is drawn tangent to the point of inflection on the curve of step (3), and the  $hv$  value at the point of intersection of the tangent line and the horizontal axis is the band gap  $E_g$  value.

## References

1. U. Pal, D. Samanta, S. Ghorai and A. Chaudhuri, *Journal of applied physics*, 1993, **74**, 6368-6374.
2. A. E. Morales, E. S. Mora and U. Pal, *Revista Mexicana de Fisica S*, 2007, **53**, 18.
